# Supplementary material for: Characteristics and Lenvatinib Treatment Response of Unresectable Hepatocellular Carcinoma with Iso-High Intensity in the Hepatobiliary Phase of EOB-MRI
Source: MDPI journal article supplement (doi:10.3390/cancers13143633), 2021-07-20
Supplement: s1 [file s1]

# Characteristics and Lenvatinib Treatment Response of Unresectable Hepatocellular Carcinoma with Iso-High Intensity in the Hepatobiliary Phase of EOB-MRI

Akinori Kubo, Goki Suda, Megumi Kimura, Osamu Maehara, Yoshimasa Tokuchi, Takashi Kitagataya, Masatsugu Ohara, Ren Yamada, Taku Shigesawa, Kazuharu Suzuki, Naoki Kawagishi, Masato Nakai, Takuya Sho, Mitsuteru Natsuizaka, Kenichi Morikawa, Koji Ogawa, Shunsuke Ohnishi and Naoya Sakamoto

**Table S1.** Cox regression analysis of association between clinical factors and overall survival

| Variables                  | Hazard Ratios | 95% Confidence Interval | <i>p</i> -Value |
|----------------------------|---------------|-------------------------|-----------------|
| Green hepatoma (+)         | 0.95          | 0.15-4.84               | 0.9613          |
| Sex: Male                  | 0.40          | 0.10-2.07               | 0.2527          |
| HBV (+)                    | 0.54          | 0.18-1.51               | 0.2459          |
| HCV (+)                    | 0.43          | 0.10-1.51               | 0.2013          |
| NBNC (+)                   | 1.27          | 0.43-4.68               | 0.5816          |
| Child-Pugh B               | 1.48          | 0.81-8.51               | 0.5100          |
| ALBI grade: 2              | 2.34          | 1.12-7.65               | 0.1173          |
| BCLC stage: C              | 2.74          | 0.81-8.51               | 0.0251          |
| Extrahepatic extension (+) | 0.93          | 0.33-2.52               | 0.8882          |

HBV, hepatitis B virus; HCV, Hepatitis C virus; NBNC, Non-B and Non-C hepatitis; BCLC, Barcelona clinic liver cancer.
